# Supplementary material
Source: PubMed Central journal article supplement (PMC8702487)
Supplement: NIHMS1747158-supplement-Supplemental_Publication_Material.pdf [file NIHMS1747158-supplement-Supplemental_Publication_Material.pdf]

## SUPPLEMENTAL MATERIALS

**Title: Endothelial GNAQ p.R183Q increases angiopoietin-2 and drives formation of enlarged blood vessels**

**Running Title: Increased PLC $\beta$ 3 activity and angiopoietin-2 in GNAQ p.R183Q endothelial cells**

**Authors:** Lan Huang<sup>1,2</sup>, Colette Bichsel<sup>1,2</sup>, Alexis Norris<sup>3</sup>, Jeremy Thorpe<sup>3</sup>, Jonathan Pevsner<sup>3</sup>, Sanda Alexandrescu<sup>4</sup>, Anna Pinto<sup>5</sup>, David Zurakowski<sup>6</sup>, Robin J. Kleiman<sup>5</sup>, Mustafa Sahin<sup>5</sup>, Arin K. Greene<sup>7,8</sup>, and Joyce Bischoff<sup>1,2 \*</sup>

**Affiliations:** <sup>1</sup>Vascular Biology Program, <sup>2</sup>Departments of Surgery, <sup>4</sup>Pathology, <sup>5</sup>Neurology, <sup>6</sup>Anesthesiology, Critical Care and Pain Medicine Research, <sup>7</sup>Plastic and Oral Surgery, and <sup>7</sup>Vascular Anomalies Center, Boston Children's Hospital and Harvard Medical School, Boston, MA 02115

<sup>3</sup>Department of Neurology, Kennedy Krieger Institute, Johns Hopkins University School of Medicine, Baltimore, MD 21205

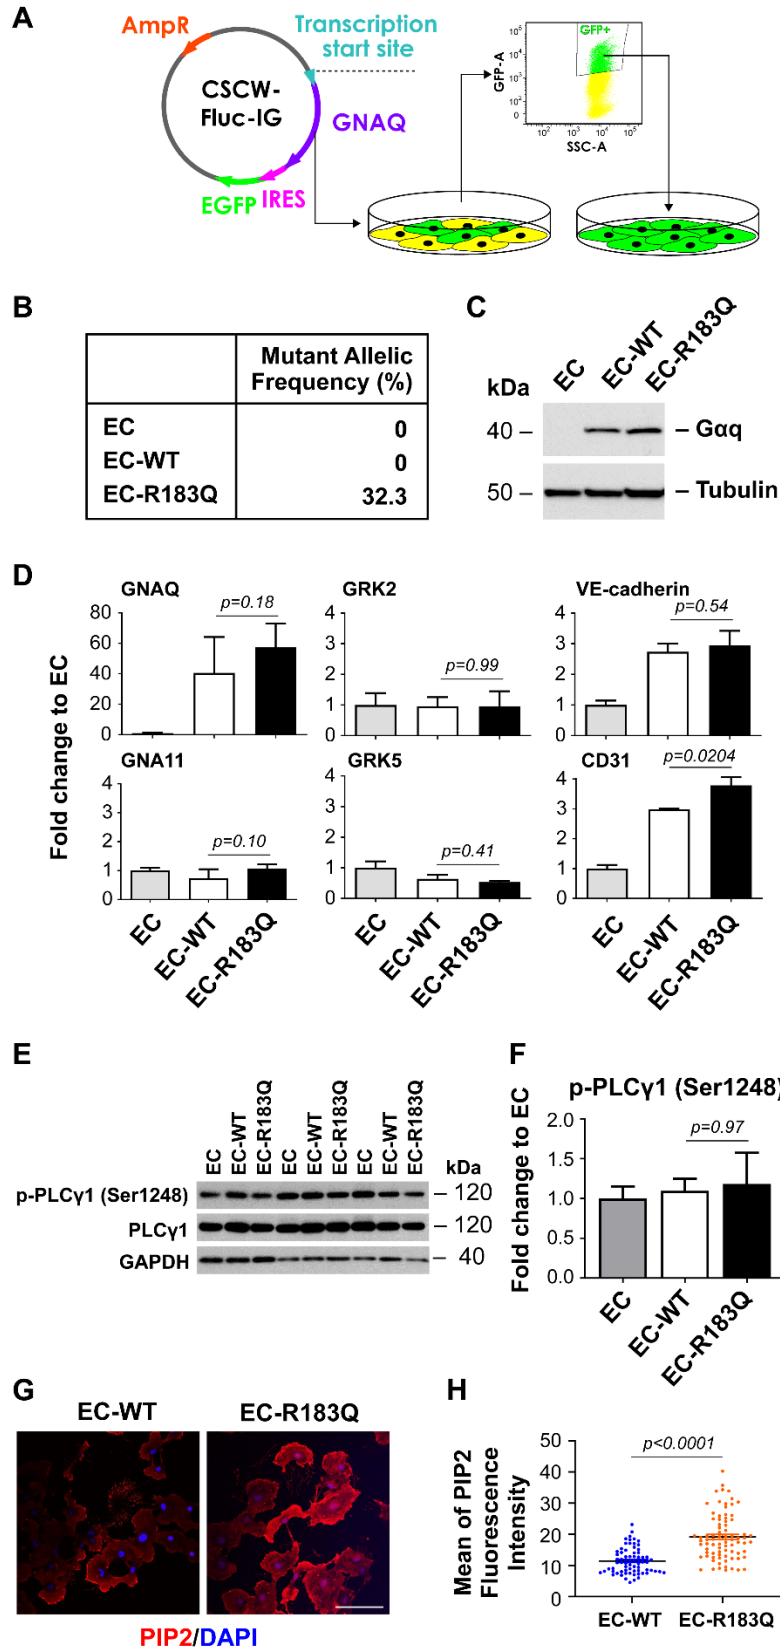

Online Figure I

**Online Figure I. Characterization of EC-WT and EC-R183Q.** (A) Schematic of lentiviral transduction and GFP+ cell sorting. (B) Mutant allelic frequency was determined by ddPCR and (C) Gαq protein level was detected by western blot. Non-transduced ECFC (EC) shown for comparison. (D) qPCR shows gene expression in EC-R183Q compared to EC-WT and non-transduced EC. *P*-values calculated by one-way ANOVA followed by Sidak's multiple comparisons in EC-WT vs. EC-R183Q. (E-F) Western blots detected no difference in the expression of p-PLCγ1(Ser1248) or PLCγ1 in EC-R183Q, EC-WT and non-transduced EC. N=3. *P*-values calculated by one-way ANOVA followed by Sidak's multiple comparisons in EC-WT vs. EC-R183Q. (G) PIP2 staining (red) in quiescent EC-R183Q versus EC-WT. Nuclei counterstained with DAPI (blue). Scale bar, 100 μm. (H) The mean of fluorescence intensity (MFI) measured in 70 cells from each (G) showed increased PIP2 in EC-R183Q. *P*-values calculated by unpaired, two-tailed Student-*t* test.

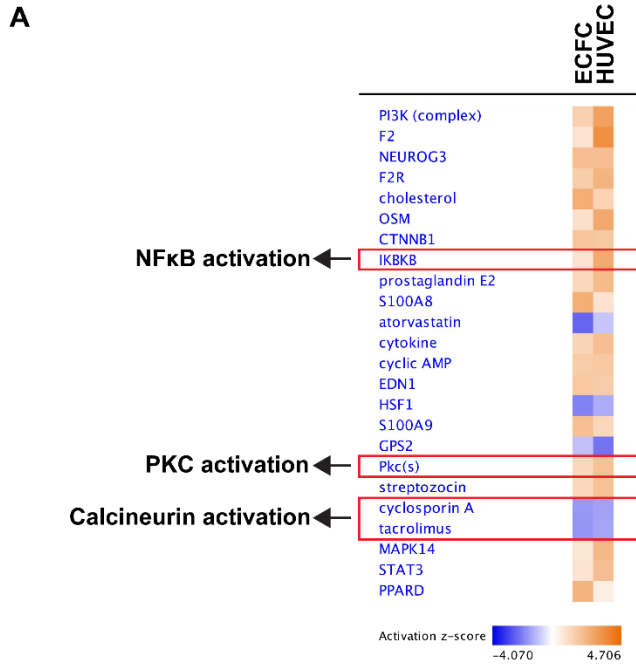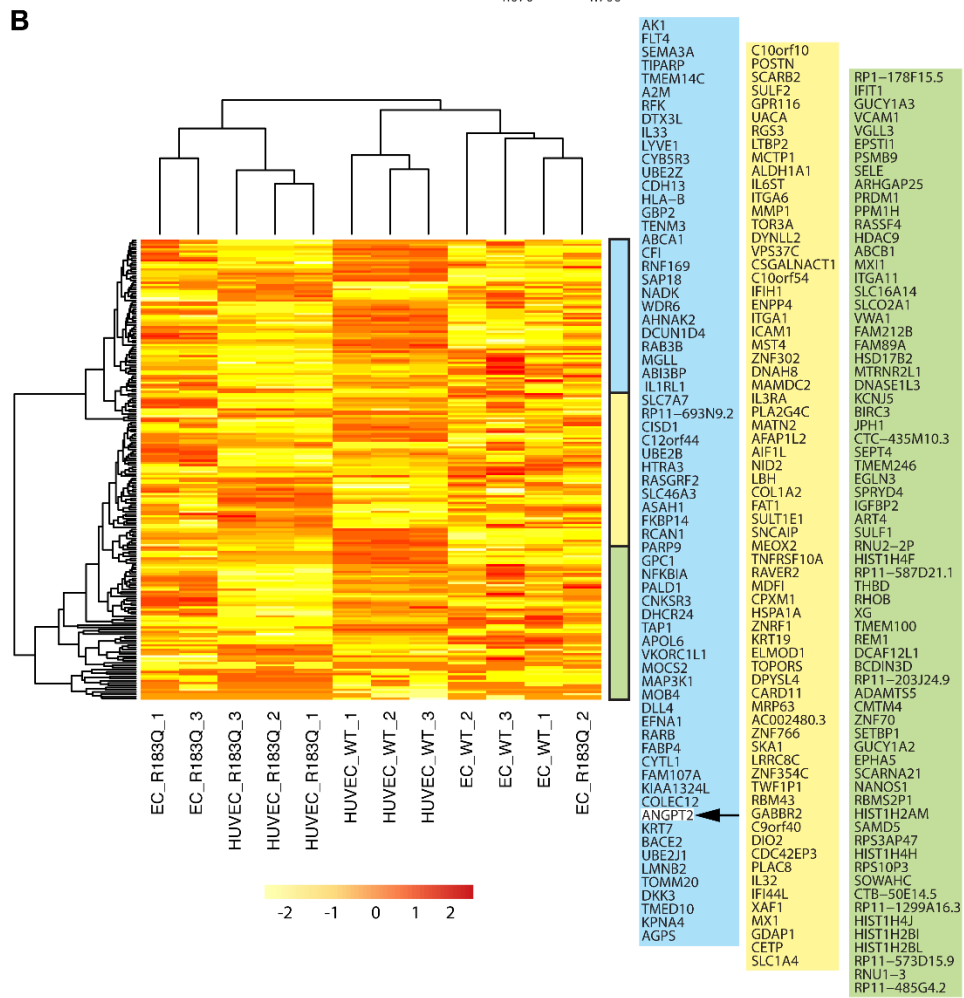

Online Figure II

**Online Figure II. RNA-seq of EC-R183Q.** (A) Differentially expressed genes between R183Q and WT *GNAQ* expressed in ECFC or in HUVEC (n=3 biological replicates for each) were analyzed for upstream regulators with concordant differential expression between R183Q and WT ECs using Ingenuity Pathway Analysis. NF- $\kappa$ B, PKC, and calcineurin activation are highlighted. (B) A heatmap of fold change-concordant genes (FDR <0.1, scaled log<sub>2</sub> CPM (Counts Per Million) expression levels) was generated in R. Euclidean distance was used with an average clustering method in the pheatmap R package. The heatmap shows clustering of three HUVEC mutant R183Q lines from three HUVEC wildtype controls (x-axis) with differences based on differential gene expression. For R183Q ECs, samples from two cell lines clustered together while a third was placed in a clade with three EC wildtype controls. ANGPT2 is indicated (arrow). Scale bar indicates expression levels.

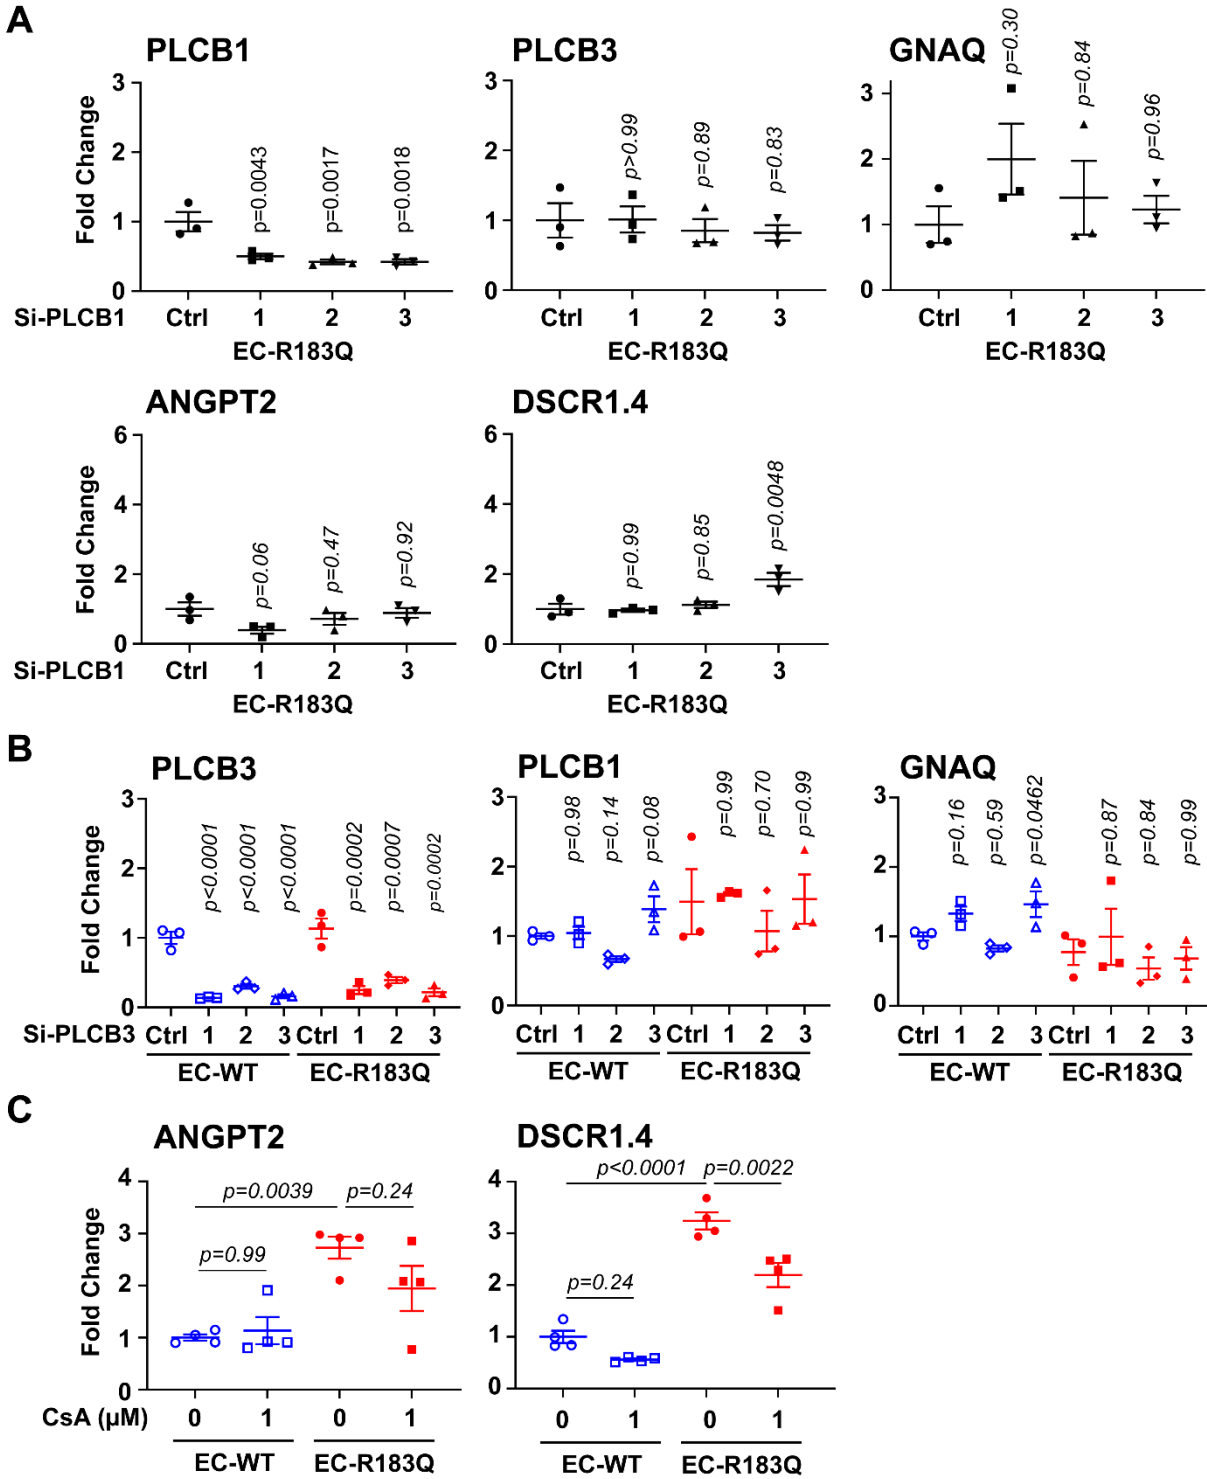

Online Figure III

**Online Figure III. Gene expression in presence of siRNA targeted to PLC $\beta$ 1 and PLC $\beta$ 3**

**and cyclosporine A treatment.** (A) EC-R183Q transfected with three PLC $\beta$ 1-siRNA and a control siRNA were assayed for gene expression by qPCR. PLC $\beta$ 1 was significantly inhibited by siRNA-PLC $\beta$ 1 while PLC $\beta$ 3, GNAQ, ANGPT2, and DSCR1.4 were not affected. *P*-values calculated by one-way ANOVA followed by Dunnett's multiple comparisons. (B) EC-WT and EC-R183Q treated with three different PLC $\beta$ 3-siRNAs and a control siRNA were assayed by qPCR. PLC $\beta$ 3 was significantly inhibited by siRNA-PLC $\beta$ 3 while PLC $\beta$ 1 and GNAQ were not affected. *P*-values calculated by one-way ANOVA followed by Dunnett's multiple comparisons. (C) EC-WT and EC-R183Q treated with 1 $\mu$ M calcineurin inhibitor Cyclosporine A (CsA) (N=4) were assayed for gene expression by qPCR. *P*-values calculated by one-way ANOVA followed by Tukey's multiple comparisons. One-way ANOVA showed *P*=0.0027 for ANGPT2 and *P*<0.0001 for DSCR1.4.

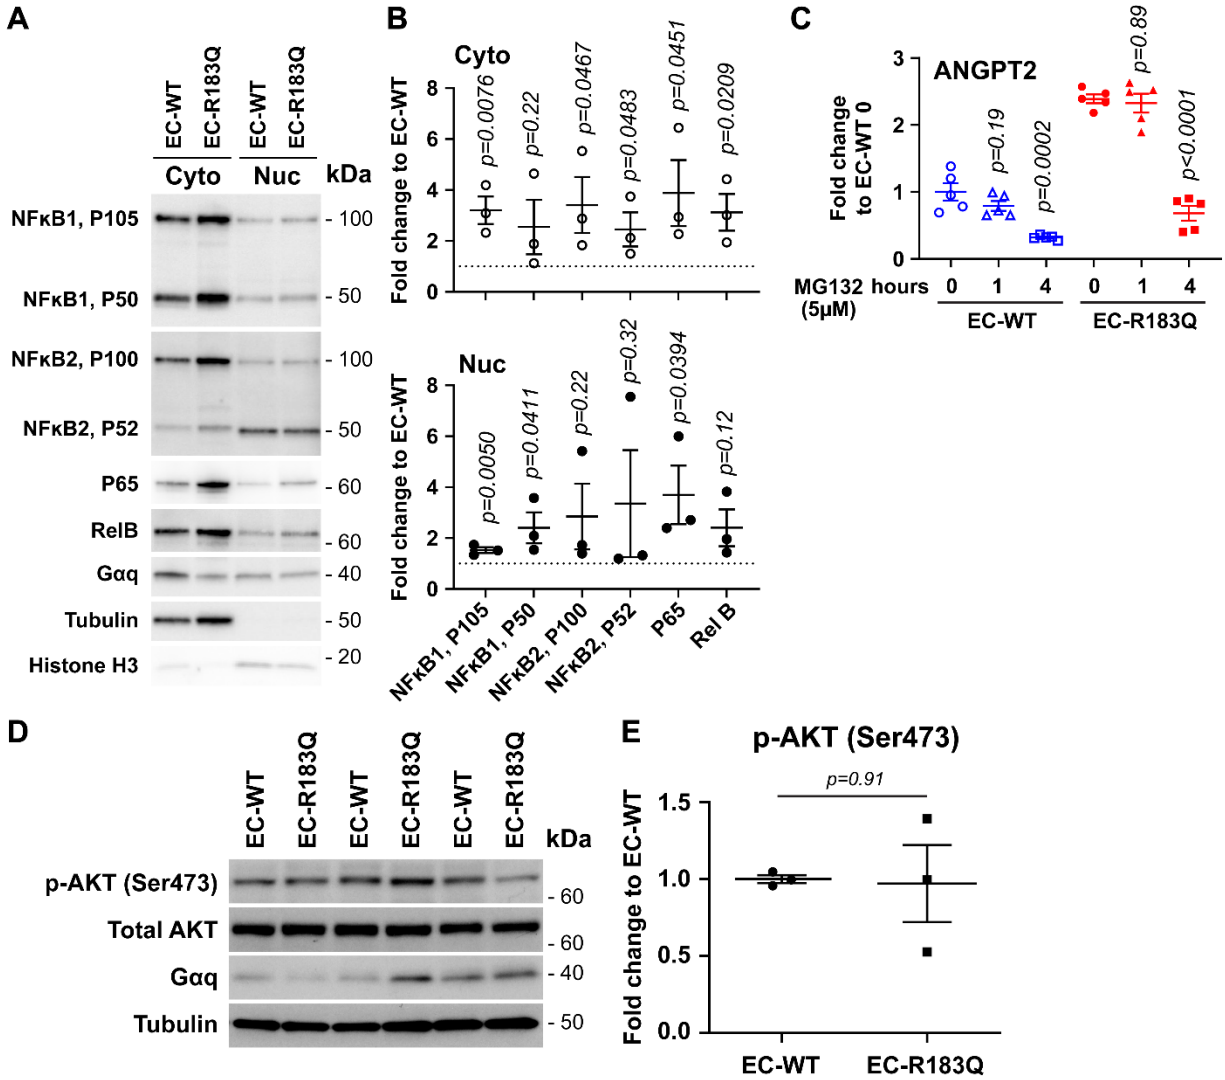

Online Figure IV

**Online Figure IV. Expression of NF-κB proteins and p-AKT (Ser473) in EC-R183Q.** (A)

Cells were lysed and separated into cytosolic (Cyto) and nuclear (Nuc) fractions for western

blot. (B) Western blot band intensities, normalized to Gaq band intensity, are presented as the

fold change to EC-WT (dashed lines). The NF-κB proteins were increased in both cytosolic

(upper panel) and nuclear (lower panel) fractions in EC-R183Q versus EC-WT. N=3. P-values

calculated by unpaired, two-tailed student t-test. (C) EC-WT and EC-R183Q were treated with

5μM proteasome inhibitor MG132 for 1 and 4 hours. A 4-hour MG132 treatment decreased

ANGPT2 mRNA levels measured by qPCR. P-values calculated by one-way ANOVA followed



by Dunnett's multiple comparisons. One-way ANOVA showed  $P=0.0004$  for EC-WT comparison and  $P<0.0001$  for EC-R183Q comparison. (D) Western blot detection of p-AKT(Ser473) in EC-R183Q and EC-WT with densitometric analysis shown in (E), expressed as the fold change to EC-WT.  $N=3$ .  $P$ -value calculated by unpaired, two-tailed Student  $t$ -test.

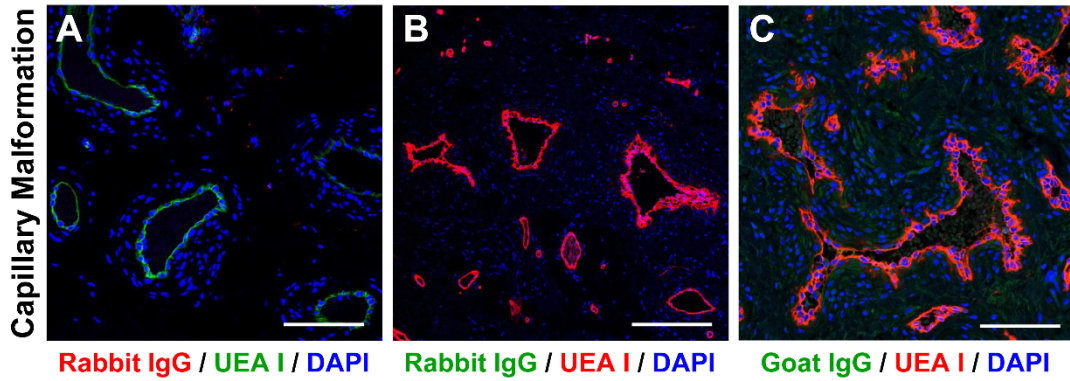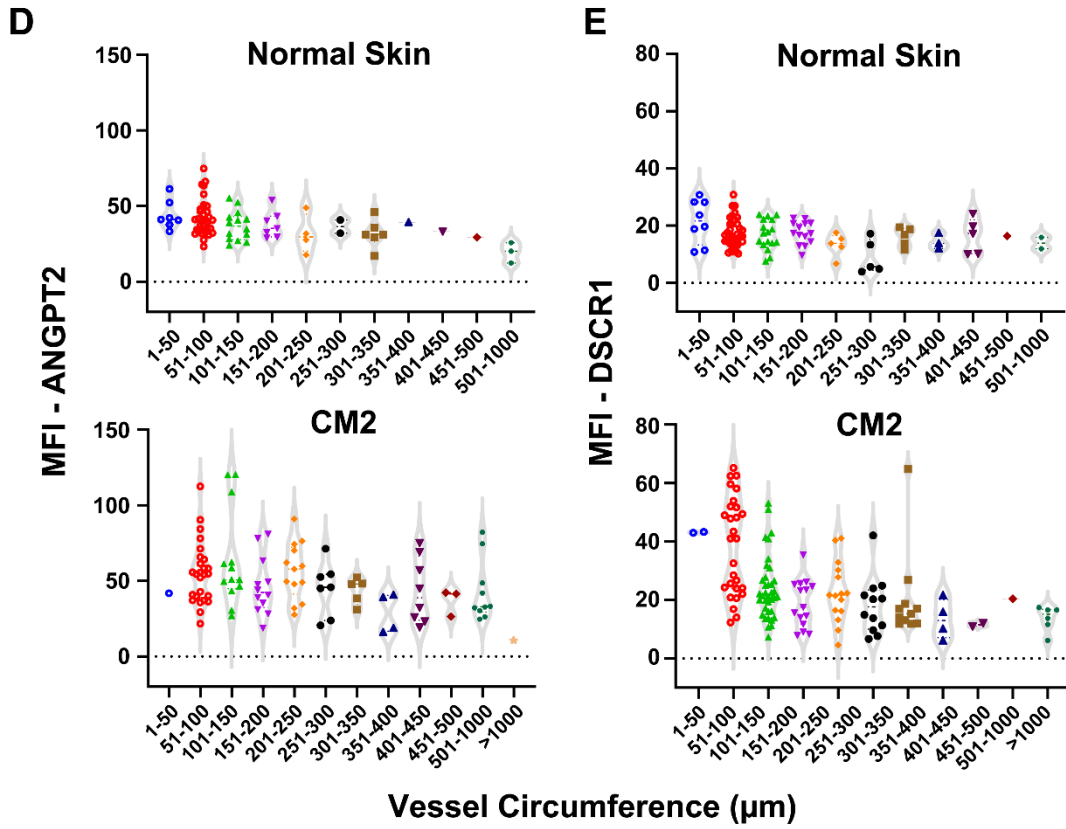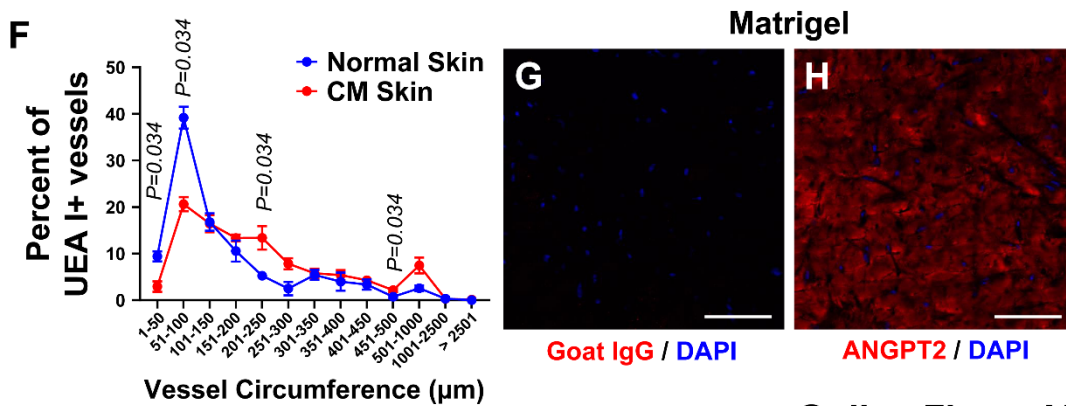

Online Figure V

**Online Figure V. Negative controls of immunostaining, MFI of ANGPT2 and DSCR1, and CM vessel circumference distribution.** (A-B): UEA I and rabbit IgG co-staining, and (C) UEA I and goat IgG co-staining of CM skin tissue sections, followed by secondary antibodies, shows no background staining with species-matched IgG for rabbit anti-p-PLC $\beta$ 3 (Ser537), rabbit anti-DSCR1 and goat anti-ANGPT2. Scale bar, 100  $\mu$ m. (D-E): The MFI of ANGPT2 (D) and DSCR1 (E) measured in Figure 4A-B was plotted versus vessel circumference. 50-100 vessels from 4-5 sections of skin CM2 (Table 1) and 2 sections of the normal skin were measured. (F): The vessel circumferences measured in four skin CMs and one normal skin was categorized and plotted. *P* values calculated using the Mann-Whitney U test. (G-H): The immunostaining of a Matrigel only implant with goat IgG (G) and goat anti-human ANGPT2 antibody (H), followed by the secondary antibody, shows background staining due to anti-ANGPT2. Nuclei counterstained with DAPI (blue). Scale bar, 100  $\mu$ m.

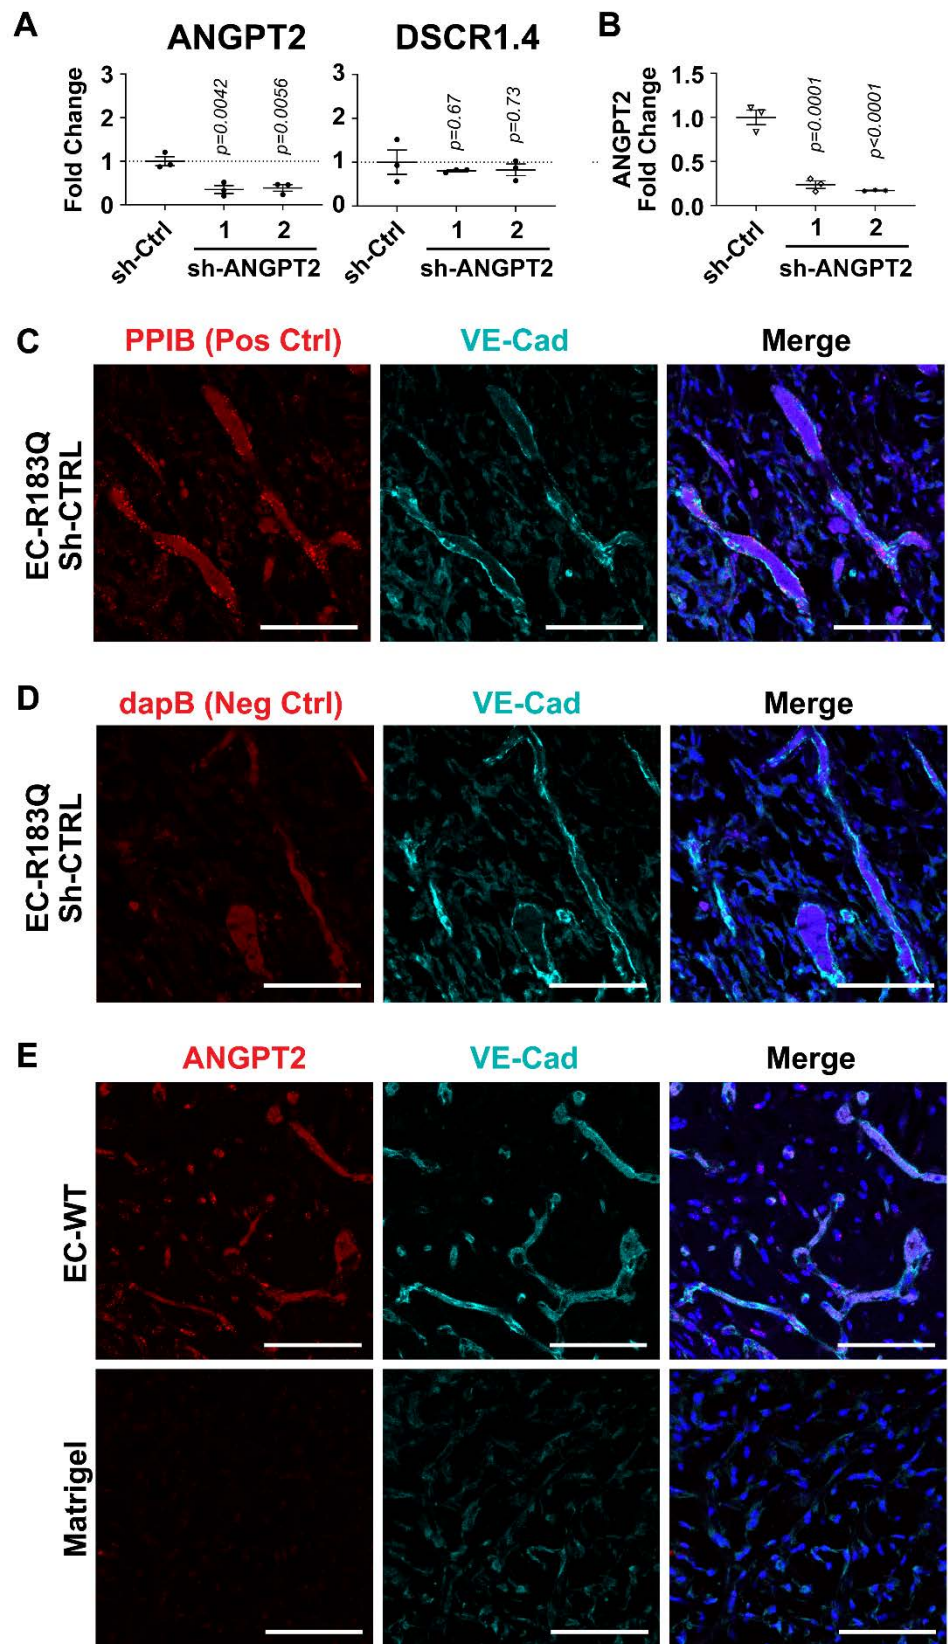

Online Figure VI

**Online Figure VI. ANGPT2 shRNA knockdown in EC-R183Q and ANGPT2 RNAscope.** (A-

B): EC-R183Q transduced with two ANGPT2 shRNA lentiviral vectors and the control vector were assayed for gene expression by qPCR (A) and ELISA (B). ANGPT2 was significantly

decreased by ANGPT2-shRNA at both mRNA level and protein level while DSCR1.4 was not affected. *P*-values calculated by one-way ANOVA followed by Dunnett's multiple comparisons.

(C-D): EC-R183Q sh-CTRL implant sections were co-stained with the positive (PPIB) or

negative (dapB) RNAscope probes (red) and anti-human VE-Cad (cyan). (E): Sections from EC-

WT implants (upper panel) and acellular Matrigel implants (lower panel) were stained

with human ANGPT2 RNAscope probe (red) and anti-human VE-Cad (cyan). Nuclei

counterstained with DAPI (blue). Scale bar, 100  $\mu$ m.

## Online Table I

| Analysis Type:                                                                 | PANTHER Overrepresentation Test (Released 20200407)                  |                |                     |                       |                            |                        |                 |
|--------------------------------------------------------------------------------|----------------------------------------------------------------------|----------------|---------------------|-----------------------|----------------------------|------------------------|-----------------|
| Annotation Version and Release Date:                                           | GO Ontology database DOI: 10.5281/zenodo.3873405 Released 2020-06-01 |                |                     |                       |                            |                        |                 |
| Analyzed List:                                                                 | upload_1 (Homo sapiens)                                              |                |                     |                       |                            |                        |                 |
| Reference List:                                                                | Homo sapiens (all genes in database)                                 |                |                     |                       |                            |                        |                 |
| Test Type:                                                                     | FISHER                                                               |                |                     |                       |                            |                        |                 |
| Correction:                                                                    | FDR                                                                  |                |                     |                       |                            |                        |                 |
| GO biological process complete                                                 | Homo sapiens - REFLIST (20851)                                       | upload_1 (288) | upload_1 (expected) | upload_1 (over/under) | upload_1 (fold Enrichment) | upload_1 (raw P-value) | upload_1 (FDR)  |
| ciliary neurotrophic factor-mediated signaling pathway (GO:0070120)            | 5                                                                    | 3              | 0.07                | +                     | 43.44                      | 1.33E-04               | 4.09E-02        |
| maintenance of protein location in nucleus (GO:0051457)                        | 24                                                                   | 5              | 0.33                | +                     | 15.08                      | 4.12E-05               | 1.88E-02        |
| maintenance of protein localization in organelle (GO:0072595)                  | 43                                                                   | 6              | 0.59                | +                     | 10.1                       | 5.19E-05               | 2.12E-02        |
| type I interferon signaling pathway (GO:0060337)                               | 69                                                                   | 8              | 0.95                | +                     | 8.39                       | 1.00E-05               | 1.07E-02        |
| cellular response to type I interferon (GO:0071357)                            | 69                                                                   | 8              | 0.95                | +                     | 8.39                       | 1.00E-05               | 1.00E-02        |
| response to type I interferon (GO:0034340)                                     | 74                                                                   | 8              | 1.02                | +                     | 7.83                       | 1.60E-05               | 1.28E-02        |
| maintenance of protein location (GO:0045185)                                   | 101                                                                  | 9              | 1.4                 | +                     | 6.45                       | 1.99E-05               | 1.45E-02        |
| protein localization to nucleus (GO:0034504)                                   | 168                                                                  | 11             | 2.32                | +                     | 4.74                       | 3.63E-05               | 1.87E-02        |
| <b>positive regulation of I-kappaB kinase/NF-kappaB signaling (GO:0043189)</b> | <b>189</b>                                                           | <b>12</b>      | <b>2.61</b>         | <b>+</b>              | <b>4.6</b>                 | <b>2.15E-05</b>        | <b>1.49E-02</b> |
| defense response to virus (GO:0051607)                                         | 204                                                                  | 11             | 2.82                | +                     | 3.9                        | 1.87E-04               | 4.98E-02        |
| viral process (GO:0016032)                                                     | 792                                                                  | 31             | 10.94               | +                     | 2.83                       | 3.37E-07               | 2.69E-03        |
| cytokine-mediated signaling pathway (GO:0019221)                               | 696                                                                  | 27             | 9.61                | +                     | 2.81                       | 2.37E-06               | 6.31E-03        |
| positive regulation of response to external stimulus (GO:0032103)              | 518                                                                  | 19             | 7.15                | +                     | 2.66                       | 1.56E-04               | 4.53E-02        |
| symbiotic process (GO:0044403)                                                 | 884                                                                  | 31             | 12.21               | +                     | 2.54                       | 3.11E-06               | 7.10E-03        |
| protein localization to organelle (GO:0033365)                                 | 774                                                                  | 26             | 10.69               | +                     | 2.43                       | 5.47E-05               | 2.13E-02        |
| cellular response to cytokine stimulus (GO:0071345)                            | 1034                                                                 | 34             | 14.28               | +                     | 2.38                       | 4.22E-06               | 7.49E-03        |
| response to cytokine (GO:0034097)                                              | 1124                                                                 | 36             | 15.53               | +                     | 2.32                       | 4.94E-06               | 7.17E-03        |
| apoptotic process (GO:0006915)                                                 | 910                                                                  | 29             | 12.57               | +                     | 2.31                       | 3.86E-05               | 1.87E-02        |
| cell death (GO:0008219)                                                        | 1079                                                                 | 34             | 14.9                | +                     | 2.28                       | 1.21E-05               | 1.14E-02        |
| programmed cell death (GO:0012501)                                             | 1042                                                                 | 31             | 14.39               | +                     | 2.15                       | 1.06E-04               | 3.61E-02        |
| defense response (GO:0006952)                                                  | 1424                                                                 | 38             | 19.67               | +                     | 1.93                       | 1.42E-04               | 4.21E-02        |
| negative regulation of biosynthetic process (GO:0009890)                       | 1589                                                                 | 42             | 21.95               | +                     | 1.91                       | 7.69E-05               | 2.73E-02        |
| negative regulation of cellular biosynthetic process (GO:0031327)              | 1559                                                                 | 40             | 21.53               | +                     | 1.86                       | 1.80E-04               | 4.95E-02        |
| cellular response to organic substance (GO:0071310)                            | 2378                                                                 | 60             | 32.85               | +                     | 1.83                       | 6.19E-06               | 8.24E-03        |
| regulation of cell population proliferation (GO:0042127)                       | 1668                                                                 | 42             | 23.04               | +                     | 1.82                       | 1.84E-04               | 4.97E-02        |
| interspecies interaction between organisms (GO:0044419)                        | 2073                                                                 | 52             | 28.63               | +                     | 1.82                       | 2.81E-05               | 1.73E-02        |
| cell surface receptor signaling pathway (GO:0007166)                           | 2519                                                                 | 63             | 34.79               | +                     | 1.81                       | 4.41E-06               | 7.04E-03        |
| negative regulation of gene expression (GO:0010629)                            | 1966                                                                 | 49             | 27.15               | +                     | 1.8                        | 6.63E-05               | 2.41E-02        |
| positive regulation of cell communication (GO:0010647)                         | 1900                                                                 | 47             | 26.24               | +                     | 1.79                       | 1.21E-04               | 4.04E-02        |
| positive regulation of signaling (GO:0023056)                                  | 1908                                                                 | 47             | 26.35               | +                     | 1.78                       | 1.27E-04               | 4.04E-02        |
| response to organic substance (GO:0010033)                                     | 3040                                                                 | 74             | 41.99               | +                     | 1.76                       | 9.22E-07               | 4.91E-03        |
| negative regulation of nitrogen compound metabolic process (GO:0051309)        | 2409                                                                 | 57             | 33.27               | +                     | 1.71                       | 6.00E-05               | 2.28E-02        |
| regulation of molecular function (GO:0065009)                                  | 3076                                                                 | 71             | 42.49               | +                     | 1.67                       | 1.21E-05               | 1.08E-02        |
| response to stress (GO:0006950)                                                | 3654                                                                 | 84             | 50.47               | +                     | 1.66                       | 1.64E-06               | 6.53E-03        |
| negative regulation of macromolecule metabolic process (GO:0010605)            | 2846                                                                 | 65             | 39.31               | +                     | 1.65                       | 4.50E-05               | 1.99E-02        |
| cellular response to chemical stimulus (GO:0070887)                            | 2941                                                                 | 67             | 40.62               | +                     | 1.65                       | 3.88E-05               | 1.82E-02        |
| regulation of cell communication (GO:0010646)                                  | 3625                                                                 | 79             | 50.07               | +                     | 1.58                       | 3.05E-05               | 1.74E-02        |
| negative regulation of metabolic process (GO:0009892)                          | 3098                                                                 | 67             | 42.79               | +                     | 1.57                       | 1.69E-04               | 4.73E-02        |
| regulation of signaling (GO:0023051)                                           | 3664                                                                 | 79             | 50.61               | +                     | 1.56                       | 3.48E-05               | 1.85E-02        |
| positive regulation of biological process (GO:0048518)                         | 6306                                                                 | 129            | 87.1                | +                     | 1.48                       | 2.82E-07               | 4.50E-03        |
| positive regulation of cellular process (GO:0048522)                           | 5737                                                                 | 117            | 79.24               | +                     | 1.48                       | 2.12E-06               | 6.78E-03        |
| regulation of response to stimulus (GO:0048583)                                | 4371                                                                 | 89             | 60.37               | +                     | 1.47                       | 8.06E-05               | 2.80E-02        |
| signal transduction (GO:0007165)                                               | 4950                                                                 | 97             | 68.37               | +                     | 1.42                       | 1.60E-04               | 4.55E-02        |
| negative regulation of biological process (GO:0048519)                         | 5530                                                                 | 108            | 76.38               | +                     | 1.41                       | 5.27E-05               | 2.10E-02        |
| signaling (GO:0023052)                                                         | 5322                                                                 | 103            | 73.51               | +                     | 1.4                        | 1.34E-04               | 4.03E-02        |
| cellular response to stimulus (GO:0051716)                                     | 6610                                                                 | 127            | 91.3                | +                     | 1.39                       | 1.34E-05               | 1.13E-02        |
| cell communication (GO:0007154)                                                | 5413                                                                 | 104            | 74.77               | +                     | 1.39                       | 1.89E-04               | 4.95E-02        |
| regulation of cellular metabolic process (GO:0031323)                          | 6299                                                                 | 121            | 87                  | +                     | 1.39                       | 2.54E-05               | 1.69E-02        |
| regulation of metabolic process (GO:0019222)                                   | 7021                                                                 | 134            | 96.98               | +                     | 1.38                       | 7.71E-06               | 9.47E-03        |
| regulation of nitrogen compound metabolic process (GO:0051171)                 | 5895                                                                 | 112            | 81.42               | +                     | 1.38                       | 1.27E-04               | 3.97E-02        |
| regulation of macromolecule metabolic process (GO:0060255)                     | 6474                                                                 | 123            | 89.42               | +                     | 1.38                       | 3.83E-05               | 1.91E-02        |
| cellular metabolic process (GO:0044237)                                        | 7796                                                                 | 143            | 107.68              | +                     | 1.33                       | 2.86E-05               | 1.69E-02        |
| primary metabolic process (GO:0044238)                                         | 7588                                                                 | 137            | 104.81              | +                     | 1.31                       | 1.26E-04               | 4.11E-02        |
| metabolic process (GO:0008152)                                                 | 8585                                                                 | 154            | 118.58              | +                     | 1.3                        | 3.05E-05               | 1.68E-02        |
| response to stimulus (GO:0050896)                                              | 8523                                                                 | 152            | 117.72              | +                     | 1.29                       | 6.40E-05               | 2.37E-02        |
| regulation of cellular process (GO:0050794)                                    | 11160                                                                | 193            | 154.15              | +                     | 1.25                       | 4.21E-06               | 8.40E-03        |
| regulation of biological process (GO:0050789)                                  | 11714                                                                | 199            | 161.8               | +                     | 1.23                       | 8.84E-06               | 1.01E-02        |
| biological regulation (GO:0065007)                                             | 12390                                                                | 206            | 171.13              | +                     | 1.2                        | 2.78E-05               | 1.77E-02        |
| cellular process (GO:0009987)                                                  | 15430                                                                | 244            | 213.12              | +                     | 1.14                       | 1.77E-05               | 1.35E-02        |
| biological_process (GO:0008150)                                                | 17912                                                                | 270            | 247.41              | +                     | 1.09                       | 4.97E-05               | 2.15E-02        |
| Unclassified (UNCLASSIFIED)                                                    | 2939                                                                 | 18             | 40.59               | -                     | 0.44                       | 4.97E-05               | 2.09E-02        |

## Major Resources Table

### Animals (in vivo studies)

| Species | Vendor or Source               | Background Strain | Sex |
|---------|--------------------------------|-------------------|-----|
| Mouse   | Massachusetts General Hospital | Nude              | M   |

### Antibodies

| Antibodies for immuno-staining      |                     |                      |                  |
|-------------------------------------|---------------------|----------------------|------------------|
| Target antigen                      | Vendor or Source    | Catalog #            | Working dilution |
| phospho-PLC $\beta$ 3, 537          | Abcam               | Ab73998              | 20 $\mu$ g/ml    |
| VE-cadherin                         | R&D Systems         | AF938                | 4 $\mu$ g/ml     |
| Angiopoietin-2                      | R&D Systems         | AF623                | 8 $\mu$ g/ml     |
| DSCR1                               | Sigma-Aldrich       | D-6694               | 15 $\mu$ g/ml    |
| phospho-ERK1/2                      | CST*                | 4370                 | 5 $\mu$ g/ml     |
| Ki67                                | Abcam               | Ab15580              | 10 $\mu$ g/ml    |
| PIP2                                | Echelon Biosciences | Z-B045               | 10 $\mu$ g/ml    |
| Ulex Europaeus Agglutinin I (UEA I) | Vector Laboratories | FL-1061/DL-1067/1068 | 25 $\mu$ g/ml    |
| Antibodies for western blot         |                     |                      |                  |
| Target antigen                      | Vendor or Source    | Catalog #            | Working dilution |
| G $\alpha$ (q)                      | CST                 | 14373                | 30 - 50 ng/ml    |
| phospho-PLC $\beta$ 3, 537          | CST                 | 2481                 | 200 - 250 ng/ml  |
| phospho-PLC $\beta$ 3, 1105         | CST                 | 2484                 | 100 - 150 ng/ml  |
| PLC $\beta$ 3                       | CST                 | 14247                | 60 -100 ng/ml    |
| phospho-PLC $\gamma$ 1, 1248        | CST                 | 8713                 | 125 ng/ml        |
| PLC $\gamma$ 1                      | CST                 | 5690                 | 165 ng/ml        |
| DSCR1                               | Sigma-Aldrich       | D-6694               | 1 $\mu$ g/ml     |
| phospho-VEGFR2, 1175                | CST                 | 3770                 | 500 - 800 ng/ml  |
| VEGFR2                              | CST                 | 2479                 | 30 - 50 ng/ml    |
| phospho-ERK1/2                      | CST                 | 4370                 | 500 - 650 ng/ml  |
| ERK1/2                              | CST                 | 4696                 | 100 - 125 ng/ml  |
| NF- $\kappa$ B1, p105/p50           | CST                 | 12540                | 480 ng/ml        |
| NF- $\kappa$ B2, p100/p52           | CST                 | 3017                 | 50 - 100 ng/ml   |
| NF $\kappa$ B, p65                  | CST                 | 8242 and 6956        | 50 - 100 ng/ml   |
| RELB                                | CST                 | 10544                | 100 ng/ml        |
| Histone H3                          | CST                 | 4499                 | 20 ng/ml         |
| Tubulin                             | Sigma-Aldrich       | T9026                | 1:4000           |
| GAPDH                               | CST                 | 2118                 | 50 ng/ml         |
| *CST, Cell Signaling Technology     |                     |                      |                  |

### Inhibitors

| Inhibitor Name | Vendor or Source | Catalog #  | Working concentration |
|----------------|------------------|------------|-----------------------|
| YM-254890      | Wako Chemicals   | 257-00631  | 10 -100nM             |
| AEB071         | Medchem Express  | HY-10343   | 0.5 -5 $\mu$ M        |
| Cyclosporin A  | Sigma-Aldrich    | 30024-25MG | 1 $\mu$ M             |
| MG-132         | Sigma-Aldrich    | M8699      | 5 $\mu$ M             |

**Growth Factors**

| <b>Name</b> | <b>Vendor or Source</b> | <b>Catalog #</b> | <b>Working concentration</b> |
|-------------|-------------------------|------------------|------------------------------|
| Human FGF2  | ProSpec-TechnoGene      | CYT-557          | 1 µg/ml                      |
| Human EPO   | ProSpec-TechnoGene      | CYT-201          | 1 µg/ml                      |

**SiRNA**

| <b>Name</b>                 | <b>Vendor or Source</b> | <b>Catalog #</b> | <b>Working concentration</b> |
|-----------------------------|-------------------------|------------------|------------------------------|
| AllStars Neg. Control siRNA | Qiagen                  | 1027281          | 10 nM                        |
| Hs_PLCB1_6                  | Qiagen                  | SI02781184       | 10 nM                        |
| Hs_PLCB1_9                  | Qiagen                  | SI04439106       | 10 nM                        |
| Hs_PLCB1_10                 | Qiagen                  | SI04439113       | 10 nM                        |
| Hs_PLCB3_3                  | Qiagen                  | SI00018781       | 10 nM                        |
| Hs_PLCB3_4                  | Qiagen                  | SI00018788       | 10 nM                        |
| Hs_PLCB3_5                  | Qiagen                  | SI03095358       | 10 nM                        |

**ShRNA**

| <b>Name</b>          | <b>Vendor or Source</b> | <b>Clone #</b> |
|----------------------|-------------------------|----------------|
| Empty Vector Control | Sigma                   | SHC001V        |
| ShANGPT2             | Sigma                   | TRCN0000059223 |
| ShANGPT2             | Sigma                   | TRCN0000059225 |

**RNAscope**

| <b>Name</b>                               | <b>Vendor or Source</b>   | <b>Catalog #</b> |
|-------------------------------------------|---------------------------|------------------|
| RNAscope Probe Hs-ANGPT2-No-XMm-C1        | Advanced Cell Diagnostics | Made-to-order    |
| RNAscope 3-plex negative control probe    | Advanced Cell Diagnostics | 320871           |
| RNAscope 3-plex positive control probe_Hs | Advanced Cell Diagnostics | 320861           |
| RNAscope co-detection ancillary kit       | Advanced Cell Diagnostics | 323180           |
| Opal 570 reagent kit                      | Akoya Biosciences         | FP1488001KT      |

**Other**

| <b>Name</b>                    | <b>Vendor or Source</b> | <b>Catalog #</b> |
|--------------------------------|-------------------------|------------------|
| Human Angiopoietin-2 ELISA Kit | R&D Systems             | BAF385           |
| Matrigel                       | Fisher Scientific       | 356237           |
